# Supplementary material for: VEGF189 binds NRP1 and is sufficient for VEGF/NRP1-dependent neuronal patterning in the developing brain
Source: PubMed Central journal article supplement (PMC4302834; doi:10.1242/dev.115998), 2015-01-15
Supplement: supp_dev.115998_DEV115998supp.pdf [file supp_dev.115998_DEV115998supp.pdf]

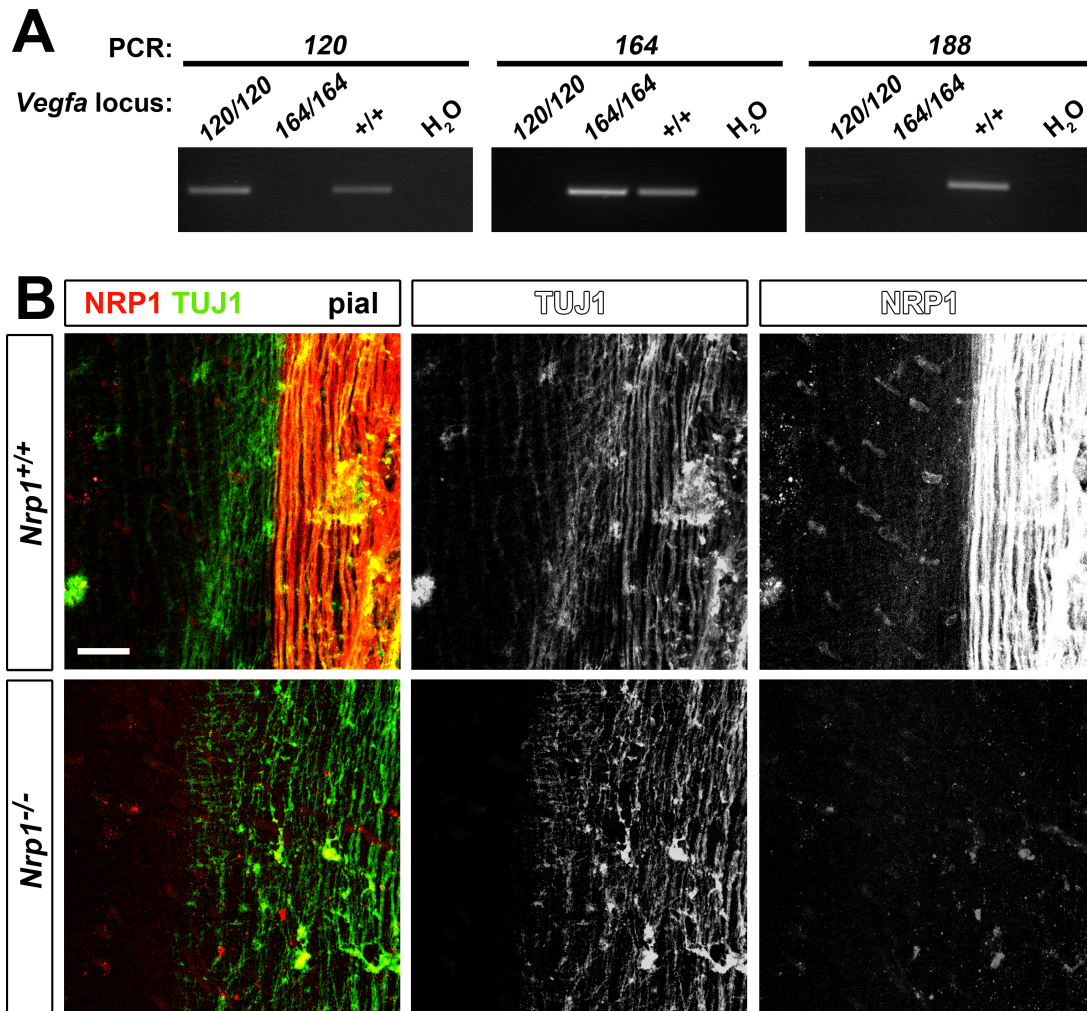

**Fig. S1. Specificity of *Vegfa* isoform PCR reagents and perseverance of the dorsolateral fascicles in *Nrp1*-null mutants.**

(A) The specificity of oligonucleotide primers for *Vegfa* isoform expression analysis was validated by RT-PCR using cDNA derived from *Vegfa*<sup>120/120</sup>, *Vegfa*<sup>164/164</sup> or wildtype E12.5 mouse embryo trunks, respectively. Note that a molecular weight standard confirmed the predicted sizes of each isoform as 179, 159 and 215 bp, respectively.

(B) Wholemout staining of E12.5 wildtype hindbrains for NRP1 and TUJ1; the single NRP1 and TUJ1 channels are shown in grey scale adjacent to each panel. Scale bar: 200  $\mu$ m.
